# Supplementary material for: Integrative medicine rehabilitation for post-stroke limb spasticity: A multicenter randomized controlled trial
Source: Research Square preprint supplement (doi:10.21203/rs.3.rs-2000448/v2), 2023-02-17
Supplement: Supplementary file 1 [file a32452c161c3a12581ef4e8d.docx]

Supplementary Table 1 Tui Na Program

| **Upper Limb Tui Na Program** | The operating hand of the therapist rolls on the shoulder of the paralyzed side for approximately 3 minutes. |
| --- | --- |
| The arm flexors of the paralyzed limbs are manipulated by hand rolling and thumb waving pressing from the shoulder to the wrist for approximately 5 minutes. |
| The arm extensors of paralyzed limbs are manipulated by hand rolling and thumb waving pressing from the shoulder to the wrist for approximately 5 minutes. |
| Finger pressure is applied on acupuncture points in the paralyzed limbs, including 2 points on the shoulder [Jianyu (LI15) and Jianliao (SJ14)], Quchi (LI11) on the lateral end of the elbow crease, three points on the forearm [Neiguan (PC6), Waiguan (SJ5), Shousanli (LI10)], and 2 points on the hand [Yangchi (SJ4), Hegu (LI4)]. |
| The Jiquan (HT1) acupoint on the paralyzed arm is manipulated by grasping; the twisting is applied on fingers. |
| The pulling, rotating, shaking, stretching and flexing manipulate on the elbow, wrist and fingers. |
| The rubbing manipulates on the elbow and wrist. |
| **Lower Limb Tui Na Program** | The operating hand of the therapist rolls on the anterior, lateral and posterior hip of the paralyzed side for approximately 3 minutes. |
| Through rolling, the lower limb flexors of the paralyzed limbs are manipulated from the hip to the ankle for approximately 3 minutes. |
| Finger pressure applies on the acupuncture points in the paralyzed limbs, Huantiao (GB30), Yinmen (BL37), Weizhong (BL40), Chengshan (BL57), Sanyinjiao (SP6), Taixi (KI3). |
| The grasping manipulates on the posterior lower limb of the paralyzed side. |
| The extensors of the lower limb are manipulated by hand rolling and thumb waving pressing from hip to ankle, along with the gall bladder and stomach meridian, for approximately 5 minutes. |
| Finger pressure is applied on nine acupuncture points in the paralyzed limbs: Xuehai (SP10), Futu (ST32), Fengshi (GB31), Zusanli (ST36), Yanglingquan (GB34), Tiaokou (ST38), Jiexi (ST41), Taichong (LR3), and Neiting (ST44); the hip, knee, and ankle are manipulated by pulling, rotating, shaking, and stretching and flexing manipulation. |
| The grasping manipulates on the anterior and lateral lower limb. |
| The rubbing manipulates on the knee and ankle. |
